# Supplementary material for: Identification of Human Retinal Organoid Cell Differentiation-Related Genes via Single-Cell Sequencing Data Analysis
Source: Hindawi journal article supplement (doi:10.1155/2022/9717599), 2022-08-08
Supplement: f1 [file 9717599.f1.zip]

gene  
ARR3  
GUCA1C  
PDE6H  
GUCA1A  
KCNV2  
GNB3  
GUCA1B  
GNAT2  
MAP1B  
CLU  
MYL4  
TF  
GUK1  
NGGT2  
CC2D2A  
UNC119  
RS1  
RCVRN  
SPP1  
PDC  
CNGB3  
LBH  
AKAP9  
04-Sep  
ACTB  
IMPG2  
WIF1  
PRCD  
SCG3  
IMPG1  
ENO2  
VIM  
HES1  
ACTG1  
CRYAB  
MAP6  
DKK3  
FSTL5  
TULP1  
AHI1  
LMOD1  
VTN  
NEUROD1  
PLEKHB1  
CHN2  
NDUFA4  
GPX3  
PDE6C  
RABL3  
HRASLS  
C1orf61  
CPLX4  
COX6A1  
SNAP25  
RGS9  
SLC1A3  
ARL6IP5

TMSB4X  
MATN2  
FOS  
ITM2C  
UQCRH  
XRCC4  
PLA2G5  
PRDX1  
ELOVL4  
PRPH2  
SERPINF1  
ADAMTS1  
NDUFB1  
GLUL  
FRZB  
PPA1  
TSPAN7  
PAX6  
RAB41  
RLBP1  
PCP4  
KIF2A  
CRABP1  
PRSS35  
NDUFA9  
ZFP36L1  
PTN  
RDH12  
SOX4  
NDUFV2  
PDE6D  
GPM6B  
ATP5G1  
SULF1  
F3  
CRYM  
TMEM14B  
FTH1  
COL2A1  
IFITM3  
SAT1  
NR4A1  
DHRS7  
FOSB  
CCND2  
TTR  
GPR37  
DBI  
TMSB10  
EGR3  
ENO1  
CYR61  
SOX2  
MGST3  
RBP4  
ATF3  
LAPTM4A  
ALDOC

PLP1  
TUBA4A  
ZFP36  
CD9  
NES  
LITAF  
GNG5  
LIX1  
RGS16  
CNN3  
SOX9  
TMEM37  
PON2  
AKAP12  
SFRP2  
RHOC  
CFI  
RNF113A  
LAP3  
RASSF4  
MCL1  
LGALS3BP  
LGALS1  
CA14  
SPARC  
CCND1  
IFITM2  
SH3BGR1  
TRAPPC5  
TUBB2B  
GADD45B  
TMEM98  
FXYD6  
FABP7  
RGR  
SPINK4  
EGR1  
SERPING1  
S100A16  
QDPR  
RDH10  
IER2  
FEZ1  
MFAP4  
OAF  
ATP6V0E1  
C1orf54  
LGALS3  
ID3  
BTG2  
RBP1  
FXYD3  
TSPAN6  
RARRES2  
MAGED2  
PLA2G16  
NDP  
FABP5

ANXA5  
UBE2L6  
DAPL1  
NGFRAP1  
TNFRSF12A  
MARCKSL1  
ISG15  
IFITM1  
H1FO  
ADORA2B  
IFIT2  
BST2  
NUPR1  
NINJ1  
S100A13  
KLF10  
ADM  
CSRP2  
ROM1  
GNGT1  
PDE6G  
SAG  
GNB1  
CABP5  
GNAT1  
CADM1  
SPTBN1  
SIX6  
NR2E3  
CA2  
PDE6A  
KCNB2  
CLUL1  
DPCD  
REEP6  
RHO  
CCKBR  
DDC  
KLF6  
RASSF2  
NRL  
GSTP1  
LEMD1  
PDE6B  
CNGA1  
PDCD4  
PPAP2C
