# Supplementary material for: Identification of Human Retinal Organoid Cell Differentiation-Related Genes via Single-Cell Sequencing Data Analysis
Source: Hindawi journal article supplement (doi:10.1155/2022/9717599), 2022-08-08
Supplement: f1 [file 9717599.f1.zip]

| p_val    | avg_logFC | pct.1 | pct.2 | cluster | gene    |
|----------|-----------|-------|-------|---------|---------|
| 6.86E-52 | 1.277791  | 0.949 | 0.698 | 1       | WIF1    |
| 6.63E-49 | 1.382381  | 1     | 0.978 | 1       | TF      |
| 4.43E-48 | 0.934903  | 0.99  | 0.844 | 1       | CLU     |
| 1.24E-46 | 0.884006  | 0.913 | 0.526 | 1       | HES1    |
| 1.80E-45 | 1.167221  | 0.964 | 0.817 | 1       | SPP1    |
| 5.19E-45 | 1.035922  | 0.964 | 0.722 | 1       | DKK3    |
| 1.71E-44 | 0.933882  | 0.769 | 0.297 | 1       | ADAMTS1 |
| 2.89E-43 | 1.026963  | 0.851 | 0.425 | 1       | SLC1A3  |
| 1.05E-42 | 1.172797  | 0.887 | 0.54  | 1       | CRYM    |
| 2.59E-39 | 0.946026  | 0.938 | 0.712 | 1       | GLUL    |
| 3.92E-39 | 1.015513  | 0.841 | 0.434 | 1       | RLBP1   |
| 1.73E-38 | 0.836399  | 0.974 | 0.753 | 1       | VIM     |
| 6.61E-37 | 0.946246  | 0.974 | 0.786 | 1       | CRYAB   |
| 4.76E-36 | 1.09531   | 0.877 | 0.567 | 1       | FRZB    |
| 7.12E-36 | 0.889293  | 0.933 | 0.722 | 1       | C1orf61 |
| 6.36E-34 | 0.945095  | 0.79  | 0.404 | 1       | PRSS35  |
| 2.08E-33 | 0.980697  | 0.974 | 0.822 | 1       | GPX3    |
| 4.39E-33 | 0.9047    | 0.718 | 0.317 | 1       | SULF1   |
| 1.43E-31 | 0.846603  | 0.728 | 0.337 | 1       | ZFP36L1 |
| 1.22E-30 | 0.884513  | 0.877 | 0.623 | 1       | SAT1    |
| 4.64E-29 | 0.872029  | 0.779 | 0.431 | 1       | PAX6    |
| 1.47E-26 | 0.868759  | 0.585 | 0.24  | 1       | PLP1    |
| 5.57E-24 | 0.820093  | 0.79  | 0.486 | 1       | GNG5    |
| 1.78E-23 | 0.854525  | 0.656 | 0.318 | 1       | CCND2   |
| 4.77E-19 | 0.891349  | 0.646 | 0.351 | 1       | SFRP2   |
| 1.01E-17 | 0.817948  | 0.631 | 0.341 | 1       | RGS16   |
| 1.15E-08 | -0.90437  | 0.882 | 0.922 | 1       | PDE6G   |
| 7.75E-06 | -0.94237  | 0.728 | 0.789 | 1       | SAG     |
| 1.07E-05 | -0.83014  | 0.713 | 0.765 | 1       | GNAT1   |
| 2.19E-54 | 1.02962   | 0.977 | 0.488 | 2       | GNAT2   |
| 6.75E-52 | 0.955234  | 1     | 0.934 | 2       | GUCA1A  |
| 2.00E-50 | 1.08075   | 1     | 0.929 | 2       | ARR3    |
| 3.62E-49 | 0.960865  | 1     | 0.968 | 2       | PDE6H   |
| 1.15E-48 | 1.004045  | 1     | 0.734 | 2       | GUCA1C  |
| 9.67E-46 | 0.998823  | 0.971 | 0.572 | 2       | MYL4    |
| 3.26E-36 | 0.801569  | 0.869 | 0.4   | 2       | MAP6    |
| 4.76E-31 | 0.850937  | 0.749 | 0.331 | 2       | PLA2G5  |
| 4.85E-21 | -1.52611  | 0.994 | 0.98  | 2       | TF      |
| 8.98E-17 | -1.10749  | 0.869 | 0.864 | 2       | CLU     |
| 3.23E-15 | -0.98116  | 0.834 | 0.829 | 2       | TMSB4X  |
| 5.27E-13 | -1.16995  | 0.766 | 0.788 | 2       | VIM     |
| 5.69E-13 | -1.52995  | 0.846 | 0.837 | 2       | SPP1    |
| 8.81E-11 | -1.31264  | 0.811 | 0.814 | 2       | CRYAB   |
| 1.69E-10 | -1.22648  | 0.771 | 0.755 | 2       | DKK3    |
| 6.07E-09 | -1.09612  | 0.349 | 0.501 | 2       | PAX6    |
| 1.26E-08 | -0.97858  | 0.863 | 0.841 | 2       | GPX3    |
| 2.08E-08 | -0.94033  | 0.343 | 0.508 | 2       | SLC1A3  |
| 2.16E-08 | -0.91027  | 0.623 | 0.687 | 2       | GPM6B   |
| 3.33E-08 | -1.29601  | 0.72  | 0.736 | 2       | WIF1    |
| 4.61E-08 | -1.26823  | 0.771 | 0.781 | 2       | SAG     |
| 5.79E-08 | -0.81753  | 0.514 | 0.593 | 2       | HES1    |
| 6.63E-08 | -0.99111  | 0.766 | 0.743 | 2       | GNB1    |
| 1.67E-07 | -0.97333  | 0.834 | 0.806 | 2       | GNGT1   |
| 2.11E-07 | -1.14851  | 0.794 | 0.746 | 2       | C1orf61 |
| 2.30E-07 | -0.86826  | 0.166 | 0.342 | 2       | NES     |
| 2.51E-07 | -1.03741  | 0.389 | 0.508 | 2       | RLBP1   |
| 6.00E-07 | -0.95044  | 0.646 | 0.689 | 2       | CABP5   |

|          |          |       |       |           |
|----------|----------|-------|-------|-----------|
| 2.15E-06 | -1.08113 | 0.749 | 0.758 | 2 GNAT1   |
| 7.22E-06 | -0.93527 | 0.68  | 0.67  | 2 DBI     |
| 1.17E-05 | -1.02891 | 0.474 | 0.556 | 2 IFITM3  |
| 2.35E-05 | -0.83072 | 0.257 | 0.382 | 2 ADAMTS1 |
| 2.82E-05 | -1.14305 | 0.531 | 0.566 | 2 PTN     |
| 3.11E-05 | -1.26999 | 0.56  | 0.595 | 2 CRYM    |
| 4.48E-05 | -1.06762 | 0.389 | 0.471 | 2 PRSS35  |
| 9.63E-05 | -0.81463 | 0.943 | 0.868 | 2 ROM1    |
| 0.000158 | -1.17746 | 0.52  | 0.581 | 2 RHO     |
| 0.000194 | -0.80344 | 0.314 | 0.406 | 2 ZFP36L1 |
| 0.000288 | -1.05832 | 0.617 | 0.611 | 2 FRZB    |
| 0.000293 | -0.87411 | 0.314 | 0.412 | 2 IFITM2  |
| 0.000351 | -0.88434 | 0.966 | 0.909 | 2 PDE6G   |
| 0.002512 | -0.85313 | 0.32  | 0.392 | 2 RGS16   |
| 6.86E-45 | 1.126399 | 0.993 | 0.865 | 3 ROM1    |
| 1.29E-43 | 1.367485 | 0.986 | 0.756 | 3 SAG     |
| 1.50E-43 | 1.154842 | 0.979 | 0.718 | 3 GNB1    |
| 5.14E-42 | 1.133789 | 0.986 | 0.789 | 3 GNGT1   |
| 4.36E-39 | 1.238951 | 1     | 0.906 | 3 PDE6G   |
| 8.45E-38 | 1.215195 | 0.958 | 0.733 | 3 GNAT1   |
| 3.13E-32 | 0.964139 | 0.937 | 0.653 | 3 CABP5   |
| 1.54E-21 | 0.947264 | 0.783 | 0.537 | 3 REEP6   |
| 2.46E-21 | 0.908899 | 0.734 | 0.407 | 3 NR2E3   |
| 5.05E-20 | 0.803684 | 0.685 | 0.364 | 3 PDE6A   |
| 2.71E-16 | 0.934887 | 0.699 | 0.436 | 3 RASSF2  |
| 9.36E-16 | -1.4131  | 0.615 | 0.787 | 3 GUCA1C  |
| 3.22E-15 | -0.80779 | 0.273 | 0.608 | 3 SIX6    |
| 5.70E-15 | -1.46846 | 0.93  | 0.939 | 3 ARR3    |
| 1.62E-13 | -0.84594 | 0.531 | 0.761 | 3 CA2     |
| 1.71E-12 | -0.91113 | 0.231 | 0.533 | 3 PCP4    |
| 3.48E-11 | -1.01194 | 0.336 | 0.577 | 3 GNAT2   |
| 4.69E-11 | 0.916277 | 0.448 | 0.232 | 3 CCKBR   |
| 5.96E-11 | -1.10382 | 0.965 | 0.973 | 3 PDE6H   |
| 6.45E-11 | 0.821089 | 0.301 | 0.116 | 3 CNGA1   |
| 1.78E-10 | -0.9634  | 0.413 | 0.649 | 3 MYL4    |
| 1.66E-09 | 1.160034 | 0.685 | 0.559 | 3 RHO     |
| 2.60E-09 | 0.811448 | 0.455 | 0.264 | 3 SLC24A1 |
| 7.95E-08 | -1.04802 | 0.622 | 0.747 | 3 WIF1    |
| 9.08E-08 | -0.90357 | 0.42  | 0.635 | 3 FRZB    |
| 9.74E-08 | -0.84301 | 0.916 | 0.946 | 3 GUCA1A  |
| 3.35E-07 | -1.2174  | 0.748 | 0.849 | 3 SPP1    |
| 4.15E-07 | -0.92896 | 0.664 | 0.831 | 3 CRYAB   |
| 7.21E-07 | -0.81015 | 0.182 | 0.388 | 3 AKAP12  |
| 5.89E-06 | -1.05129 | 0.455 | 0.607 | 3 CRYM    |
| 0.003713 | -1.01165 | 0.965 | 0.983 | 3 TF      |
| 7.18E-49 | 1.295336 | 1     | 0.789 | 4 GNGT1   |
| 2.84E-42 | 1.135977 | 0.87  | 0.347 | 4 PDE6A   |
| 3.13E-42 | 1.196662 | 0.985 | 0.733 | 4 GNAT1   |
| 8.16E-42 | 1.338461 | 0.977 | 0.759 | 4 SAG     |
| 6.40E-39 | 1.02611  | 1     | 0.865 | 4 ROM1    |
| 1.33E-37 | 0.95187  | 0.985 | 0.72  | 4 GNB1    |
| 1.86E-37 | 0.944247 | 0.901 | 0.393 | 4 NR2E3   |
| 2.18E-37 | 0.860631 | 0.809 | 0.3   | 4 CLUL1   |
| 6.92E-37 | 1.109769 | 1     | 0.907 | 4 PDE6G   |
| 6.76E-34 | 0.938023 | 0.969 | 0.653 | 4 CABP5   |
| 1.64E-30 | 1.093322 | 0.641 | 0.213 | 4 CCKBR   |
| 5.62E-27 | 0.810902 | 0.664 | 0.244 | 4 SLC24A1 |
| 1.91E-22 | 1.327235 | 0.863 | 0.542 | 4 RHO     |

|          |          |       |       |            |
|----------|----------|-------|-------|------------|
| 3.24E-09 | -1.1789  | 0.931 | 0.939 | 4 ARR3     |
| 7.69E-09 | -1.0951  | 0.687 | 0.778 | 4 GUCA1C   |
| 1.23E-07 | -0.82625 | 0.076 | 0.286 | 4 PCDH9    |
| 3.95E-05 | -0.81561 | 0.351 | 0.472 | 4 MAP6     |
| 9.66E-05 | -0.93956 | 0.519 | 0.555 | 4 GNAT2    |
| 0.000112 | -0.87616 | 0.588 | 0.628 | 4 MYL4     |
| 0.001304 | -0.83077 | 0.748 | 0.733 | 4 WIF1     |
| 2.00E-57 | 0.804495 | 0.797 | 0.157 | 5 LITAF    |
| 2.52E-47 | 1.414266 | 0.983 | 0.503 | 5 IFITM3   |
| 2.77E-44 | 0.835068 | 0.729 | 0.176 | 5 TMEM37   |
| 2.30E-43 | 0.909569 | 0.644 | 0.14  | 5 S100A16  |
| 2.84E-42 | 0.833367 | 0.915 | 0.344 | 5 RHOC     |
| 6.14E-42 | 0.925542 | 0.678 | 0.164 | 5 NINJ1    |
| 6.10E-40 | 0.894462 | 0.788 | 0.238 | 5 F3       |
| 5.98E-39 | 1.066036 | 0.975 | 0.54  | 5 CNN3     |
| 1.59E-38 | 0.839837 | 0.831 | 0.272 | 5 ATP6V0E1 |
| 4.40E-38 | 1.11275  | 0.958 | 0.524 | 5 PTN      |
| 1.19E-37 | 0.845703 | 0.992 | 0.543 | 5 HES1     |
| 1.93E-37 | 0.844078 | 0.847 | 0.293 | 5 PET112   |
| 2.40E-37 | 1.109617 | 1     | 0.64  | 5 DBI      |
| 3.48E-37 | 0.809462 | 0.814 | 0.264 | 5 SPARC    |
| 4.38E-37 | 0.966908 | 0.941 | 0.443 | 5 SLC1A3   |
| 4.87E-37 | 1.15479  | 0.915 | 0.416 | 5 PRSS35   |
| 8.99E-37 | 1.313213 | 0.958 | 0.579 | 5 FRZB     |
| 1.13E-36 | 0.961045 | 0.975 | 0.487 | 5 GNG5     |
| 2.04E-36 | 1.199845 | 0.992 | 0.73  | 5 C1orf61  |
| 3.87E-36 | 1.371513 | 1     | 0.796 | 5 CRYAB    |
| 4.38E-35 | 0.981493 | 1     | 0.765 | 5 VIM      |
| 7.21E-35 | 1.173252 | 1     | 0.734 | 5 DKK3     |
| 2.43E-34 | 1.113281 | 0.847 | 0.357 | 5 IFITM2   |
| 3.28E-34 | 1.140289 | 1     | 0.852 | 5 CLU      |
| 4.87E-34 | 0.94326  | 0.975 | 0.65  | 5 GPM6B    |
| 6.23E-34 | 1.300568 | 0.712 | 0.227 | 5 LGALS1   |
| 7.29E-34 | 0.97109  | 0.644 | 0.178 | 5 LGALS3   |
| 1.08E-33 | -1.383   | 0.983 | 0.963 | 5 GNB3     |
| 2.31E-32 | 1.160382 | 0.983 | 0.71  | 5 WIF1     |
| 9.47E-32 | 1.062649 | 0.966 | 0.63  | 5 SAT1     |
| 9.62E-32 | 0.897036 | 0.941 | 0.471 | 5 BTG2     |
| 1.05E-31 | 0.872291 | 0.797 | 0.297 | 5 DAPL1    |
| 1.25E-31 | 1.263808 | 0.992 | 0.823 | 5 SPP1     |
| 1.37E-31 | 1.360777 | 0.932 | 0.558 | 5 CRYM     |
| 4.89E-31 | 0.904422 | 0.475 | 0.102 | 5 ANXA2    |
| 2.96E-30 | 0.826116 | 1     | 0.836 | 5 FOS      |
| 3.54E-30 | 1.037055 | 0.814 | 0.341 | 5 RGS16    |
| 5.63E-30 | 0.898886 | 0.788 | 0.323 | 5 GADD45B  |
| 1.20E-29 | 1.164791 | 0.864 | 0.457 | 5 RLBP1    |
| 1.89E-29 | 0.909638 | 1     | 0.72  | 5 GLUL     |
| 5.65E-29 | -1.04224 | 1     | 0.991 | 5 RCVRN    |
| 6.87E-29 | 1.047073 | 0.797 | 0.355 | 5 SFRP2    |
| 8.56E-29 | 0.877193 | 0.797 | 0.335 | 5 SULF1    |
| 1.07E-27 | 1.544451 | 0.839 | 0.392 | 5 IFITM1   |
| 2.46E-27 | -0.9381  | 1     | 0.995 | 5 MAP1B    |
| 2.58E-27 | 0.874478 | 0.814 | 0.343 | 5 FABP7    |
| 1.52E-26 | 0.82489  | 0.941 | 0.572 | 5 IER2     |
| 2.13E-26 | 0.845675 | 0.847 | 0.428 | 5 RASSF4   |
| 3.21E-25 | -1.09498 | 0.958 | 0.935 | 5 UNC119   |
| 6.78E-25 | 0.837027 | 0.72  | 0.281 | 5 ADM      |
| 1.97E-24 | -1.49786 | 0.992 | 0.97  | 5 PDE6H    |

|          |          |       |       |             |
|----------|----------|-------|-------|-------------|
| 6.96E-24 | -1.00115 | 0.941 | 0.938 | 5 AKAP9     |
| 1.56E-23 | 0.953628 | 0.712 | 0.286 | 5 ID3       |
| 3.32E-23 | 0.95913  | 0.458 | 0.121 | 5 IFIT2     |
| 3.34E-23 | -1.26329 | 0.949 | 0.908 | 5 KCNV2     |
| 9.51E-23 | 1.167863 | 0.525 | 0.163 | 5 IFIT3     |
| 5.78E-21 | -1.36107 | 0.941 | 0.892 | 5 GUCA1B    |
| 2.45E-20 | 1.083846 | 0.992 | 0.83  | 5 GPX3      |
| 1.42E-19 | -1.1579  | 0.72  | 0.823 | 5 FSTL5     |
| 2.01E-19 | -0.98062 | 0.907 | 0.864 | 5 ENO2      |
| 2.42E-19 | -1.24793 | 0.89  | 0.887 | 5 04-Sep    |
| 1.02E-18 | -1.40911 | 0.992 | 0.938 | 5 GUCA1A    |
| 1.03E-18 | 1.678533 | 0.805 | 0.453 | 5 ISG15     |
| 2.97E-18 | -1.07655 | 0.746 | 0.833 | 5 NEUROD1   |
| 1.48E-17 | -1.66376 | 0.975 | 0.935 | 5 ARR3      |
| 4.22E-17 | 1.345494 | 0.449 | 0.156 | 5 CCL2      |
| 1.08E-16 | -1.09014 | 0.78  | 0.811 | 5 IMPG2     |
| 3.73E-15 | -1.10807 | 0.89  | 0.85  | 5 CNGB1     |
| 1.15E-14 | 1.133376 | 1     | 0.98  | 5 TF        |
| 4.80E-14 | -0.97158 | 0.729 | 0.793 | 5 PDC       |
| 1.03E-13 | -0.90335 | 0.61  | 0.732 | 5 SNAP25    |
| 1.87E-13 | -1.23329 | 0.703 | 0.741 | 5 GNGT2     |
| 3.66E-13 | 0.823281 | 0.415 | 0.157 | 5 AQP4      |
| 1.67E-12 | -0.94832 | 0.907 | 0.846 | 5 AIPL1     |
| 1.36E-11 | -0.87926 | 0.746 | 0.83  | 5 RP1       |
| 3.50E-11 | -0.95911 | 1     | 0.91  | 5 GUK1      |
| 8.62E-11 | -1.07558 | 0.898 | 0.876 | 5 ROM1      |
| 9.47E-11 | -0.97428 | 0.686 | 0.731 | 5 SCG3      |
| 1.21E-10 | -0.93197 | 0.636 | 0.727 | 5 PRPH2     |
| 1.26E-10 | -0.91534 | 0.89  | 0.809 | 5 PLEKHB1   |
| 1.84E-10 | -1.04606 | 0.525 | 0.663 | 5 IMPG1     |
| 2.34E-10 | -0.90697 | 0.297 | 0.542 | 5 LOC157627 |
| 9.11E-10 | -0.90919 | 0.593 | 0.674 | 5 CPLX4     |
| 9.14E-10 | -0.88251 | 0.517 | 0.685 | 5 RBP3      |
| 2.91E-09 | -1.08283 | 0.525 | 0.647 | 5 ABCA4     |
| 2.93E-09 | -0.94368 | 0.593 | 0.676 | 5 CHN2      |
| 5.46E-09 | -1.05796 | 0.602 | 0.669 | 5 RS1       |
| 1.20E-08 | -0.94313 | 0.686 | 0.688 | 5 VTN       |
| 1.29E-08 | -1.0365  | 0.585 | 0.658 | 5 CC2D2A    |
| 1.39E-08 | -1.27562 | 0.839 | 0.762 | 5 GUCA1C    |
| 3.09E-08 | -0.86431 | 0.61  | 0.686 | 5 PROM1     |
| 1.21E-07 | -0.89042 | 0.703 | 0.725 | 5 AHI1      |
| 1.32E-07 | -0.84667 | 0.508 | 0.61  | 5 STX3      |
| 3.96E-07 | -0.90933 | 0.958 | 0.912 | 5 PDE6G     |
| 4.95E-07 | -0.82485 | 0.449 | 0.562 | 5 MPP4      |
| 2.42E-06 | -1.40282 | 0.661 | 0.621 | 5 MYL4      |
| 3.55E-06 | -1.04012 | 0.475 | 0.559 | 5 GNAT2     |
| 6.11E-06 | -0.81653 | 0.898 | 0.779 | 5 LBH       |
| 1.58E-05 | -0.90378 | 0.39  | 0.511 | 5 PCP4      |
| 5.88E-05 | -0.85148 | 0.475 | 0.534 | 5 RGS9      |
| 8.06E-05 | -0.93528 | 0.373 | 0.468 | 5 LMOD1     |
| 9.23E-05 | -0.81555 | 0.517 | 0.574 | 5 CDHR1     |
| 0.009794 | -0.81653 | 0.805 | 0.752 | 5 GNAT1     |
| 1.68E-48 | 1.169499 | 1     | 0.969 | 6 PDE6H     |
| 2.89E-48 | 1.237131 | 1     | 0.748 | 6 GUCA1C    |
| 1.36E-46 | 1.321326 | 1     | 0.933 | 6 ARR3      |
| 5.25E-44 | 1.134427 | 1     | 0.59  | 6 MYL4      |
| 7.94E-43 | 1.032254 | 1     | 0.51  | 6 GNAT2     |
| 5.99E-40 | 0.971999 | 1     | 0.938 | 6 GUCA1A    |

|          |          |       |       |            |
|----------|----------|-------|-------|------------|
| 4.07E-39 | 0.934104 | 1     | 0.911 | 6 GUK1     |
| 1.88E-37 | 0.832662 | 0.929 | 0.342 | 6 HRASLS   |
| 3.12E-37 | 0.95088  | 0.965 | 0.414 | 6 MAP6     |
| 6.51E-37 | 0.949771 | 1     | 0.714 | 6 GNGT2    |
| 1.15E-33 | 0.826977 | 0.938 | 0.416 | 6 LMOD1    |
| 1.47E-32 | 0.97145  | 0.832 | 0.345 | 6 PLA2G5   |
| 1.33E-27 | 0.825894 | 0.735 | 0.261 | 6 TTR      |
| 6.16E-22 | -1.91621 | 0.991 | 0.981 | 6 TF       |
| 4.32E-14 | -1.29309 | 0.965 | 0.856 | 6 CLU      |
| 7.59E-13 | -1.05105 | 0.823 | 0.83  | 6 TMSB4X   |
| 4.28E-09 | -1.69303 | 0.867 | 0.835 | 6 SPP1     |
| 6.28E-09 | -1.48366 | 0.894 | 0.806 | 6 CRYAB    |
| 4.79E-08 | -1.20983 | 0.823 | 0.782 | 6 VIM      |
| 4.92E-08 | -1.11948 | 0.956 | 0.834 | 6 GPX3     |
| 1.16E-07 | -1.03648 | 0.805 | 0.739 | 6 GLUL     |
| 1.96E-07 | -1.5012  | 0.779 | 0.73  | 6 WIF1     |
| 4.42E-06 | -1.29144 | 0.832 | 0.75  | 6 DKK3     |
| 5.53E-06 | -1.0336  | 0.876 | 0.804 | 6 GNGT1    |
| 7.28E-06 | -1.37217 | 0.876 | 0.741 | 6 C1orf61  |
| 1.04E-05 | -1.43721 | 0.867 | 0.772 | 6 SAG      |
| 1.09E-05 | -1.06264 | 0.699 | 0.682 | 6 CABP5    |
| 4.49E-05 | -1.01834 | 0.991 | 0.909 | 6 PDE6G    |
| 0.000142 | -0.90405 | 0.973 | 0.869 | 6 ROM1     |
| 0.000192 | -1.2868  | 0.894 | 0.745 | 6 GNAT1    |
| 0.000315 | -0.84646 | 0.265 | 0.376 | 6 CCND2    |
| 0.000374 | -1.0829  | 0.319 | 0.406 | 6 PDE6A    |
| 0.000771 | -0.86729 | 0.274 | 0.374 | 6 ADAMTS1  |
| 0.000801 | -0.89331 | 0.319 | 0.401 | 6 ZFP36L1  |
| 0.001396 | -1.04696 | 0.407 | 0.465 | 6 PRSS35   |
| 0.00162  | -1.1789  | 0.575 | 0.56  | 6 PTN      |
| 0.002537 | -1.37987 | 0.566 | 0.573 | 6 RHO      |
| 0.003827 | -1.38542 | 0.646 | 0.586 | 6 CRYM     |
| 0.004914 | -0.89044 | 0.903 | 0.732 | 6 GNB1     |
| 0.005377 | -1.12009 | 0.575 | 0.543 | 6 IFITM3   |
| 0.006125 | -1.00043 | 0.496 | 0.486 | 6 SLC1A3   |
| 0.009805 | -0.89685 | 0.336 | 0.379 | 6 SULF1    |
| 1.75E-37 | 0.958805 | 0.396 | 0.052 | 7 TAGLN3   |
| 4.15E-34 | 1.414364 | 0.368 | 0.051 | 7 TMEM215  |
| 5.02E-31 | 1.490163 | 0.406 | 0.073 | 7 STMN2    |
| 1.97E-28 | 1.6976   | 0.425 | 0.089 | 7 ISL1     |
| 1.99E-28 | 0.822703 | 0.274 | 0.031 | 7 GABRR1   |
| 5.03E-24 | 0.88249  | 0.292 | 0.046 | 7 PCP4L1   |
| 3.23E-19 | 0.986339 | 0.358 | 0.088 | 7 CA10     |
| 3.80E-17 | 0.8543   | 0.953 | 0.89  | 7 SOX4     |
| 7.45E-16 | 0.833131 | 0.642 | 0.329 | 7 CELF4    |
| 4.19E-15 | 1.277036 | 0.519 | 0.215 | 7 CPLX3    |
| 6.18E-13 | -0.80539 | 0.84  | 0.918 | 7 KCNV2    |
| 7.27E-13 | 0.805342 | 0.726 | 0.476 | 7 CCDC88A  |
| 9.66E-12 | 1.235863 | 0.302 | 0.098 | 7 ONECUT2  |
| 1.99E-11 | 1.095061 | 0.16  | 0.03  | 7 LRTM1    |
| 7.91E-11 | 0.884948 | 0.425 | 0.192 | 7 SERPINI1 |
| 1.05E-10 | 0.843122 | 0.358 | 0.144 | 7 RTN1     |
| 1.36E-10 | -1.13064 | 0.981 | 0.971 | 7 PDE6H    |
| 1.63E-10 | -1.33278 | 0.934 | 0.939 | 7 ARR3     |
| 2.03E-10 | -0.97835 | 0.943 | 0.943 | 7 GUCA1A   |
| 2.28E-10 | 0.851538 | 0.217 | 0.058 | 7 SEMA3E   |
| 7.96E-10 | 0.873505 | 0.34  | 0.129 | 7 ARID5B   |
| 8.47E-10 | -0.8143  | 0.887 | 0.897 | 7 GUCA1B   |

|          |          |       |       |             |
|----------|----------|-------|-------|-------------|
| 1.38E-09 | -1.31701 | 0.443 | 0.64  | 7 MYL4      |
| 3.08E-09 | 1.167903 | 0.179 | 0.046 | 7 CXCL14    |
| 5.99E-08 | 0.924314 | 0.547 | 0.327 | 7 CADPS     |
| 9.20E-08 | -0.82774 | 0.349 | 0.569 | 7 GNAT2     |
| 3.61E-07 | -1.16314 | 0.726 | 0.773 | 7 GUCA1C    |
| 1.69E-06 | -0.83344 | 0.198 | 0.408 | 7 HRASLS    |
| 0.000164 | -0.80149 | 0.443 | 0.603 | 7 CRYM      |
| 0.005354 | 0.99507  | 0.321 | 0.236 | 7 CNTNAP2   |
| 9.28E-29 | 0.925794 | 1     | 0.939 | 8 GUCA1A    |
| 2.36E-27 | 0.802207 | 1     | 0.962 | 8 GNB3      |
| 2.74E-27 | 0.95069  | 1     | 0.97  | 8 PDE6H     |
| 1.83E-25 | 0.985799 | 1     | 0.934 | 8 ARR3      |
| 5.95E-25 | 0.965413 | 0.988 | 0.754 | 8 GUCA1C    |
| 1.34E-20 | 0.920324 | 0.953 | 0.602 | 8 MYL4      |
| 4.22E-11 | -1.0775  | 0.721 | 0.837 | 8 TMSB4X    |
| 2.21E-10 | -1.51101 | 0.988 | 0.981 | 8 TF        |
| 1.90E-09 | -1.09004 | 0.779 | 0.871 | 8 CLU       |
| 4.92E-09 | -1.12243 | 0.256 | 0.583 | 8 PTN       |
| 1.44E-08 | -1.17529 | 0.628 | 0.822 | 8 GNMT1     |
| 1.94E-08 | -0.86676 | 0.326 | 0.6   | 8 HES1      |
| 2.30E-08 | -1.09074 | 0.628 | 0.796 | 8 VIM       |
| 3.45E-07 | -1.31756 | 0.419 | 0.625 | 8 FRZB      |
| 5.86E-07 | -1.11579 | 0.547 | 0.747 | 8 WIF1      |
| 1.77E-06 | -1.3942  | 0.791 | 0.841 | 8 SPP1      |
| 1.31E-05 | -0.83981 | 0.058 | 0.268 | 8 CCKBR     |
| 1.52E-05 | -0.95711 | 0.291 | 0.494 | 8 PAX6      |
| 1.79E-05 | -1.05972 | 0.663 | 0.788 | 8 SAG       |
| 2.59E-05 | -1.20183 | 0.779 | 0.816 | 8 CRYAB     |
| 2.62E-05 | -0.90558 | 0.628 | 0.766 | 8 DKK3      |
| 2.76E-05 | -0.82471 | 0.43  | 0.583 | 8 TMSB10    |
| 4.11E-05 | -0.91865 | 0.209 | 0.411 | 8 PDE6A     |
| 9.19E-05 | -0.91695 | 0.36  | 0.558 | 8 IFITM3    |
| 0.000128 | -0.94911 | 0.198 | 0.395 | 8 RGS16     |
| 0.00014  | -1.20865 | 0.453 | 0.6   | 8 CRYM      |
| 0.000154 | -0.94503 | 0.326 | 0.504 | 8 RLBP1     |
| 0.000166 | -0.81439 | 0.547 | 0.68  | 8 DBI       |
| 0.000255 | -0.80854 | 0.221 | 0.392 | 8 LOC645323 |
| 0.000481 | -0.93618 | 0.686 | 0.757 | 8 C1orf61   |
| 0.001075 | -1.07694 | 0.721 | 0.76  | 8 GNAT1     |
| 0.00228  | -0.96569 | 0.802 | 0.847 | 8 GPX3      |
