# Supplementary material for: Identification of Human Retinal Organoid Cell Differentiation-Related Genes via Single-Cell Sequencing Data Analysis
Source: Comput Math Methods Med. 2022 Aug 8;2022:9717599. doi: 10.1155/2022/9717599 (PMC9377943; doi:10.1155/2022/9717599)
Supplement: Supplementary Materials — Data S1: sequencing data matrix of 1346 cells. Table S2: marker genes for each cell cluster. Table S3: retinal organoid cell differentiation-related genes. [file 9717599.f1.zip]

Archive with 3 entries (3 files):
- data S1.txt
- Table S2.pdf
- Table S3.pdf
